# Supplementary material
Source: Springer Nature journal article supplement (https://www.springermedizin.de/resource/supplementary/12982_2009_88_MOESM3_ESM.pdf/9604460)

## Simulated episode incidence

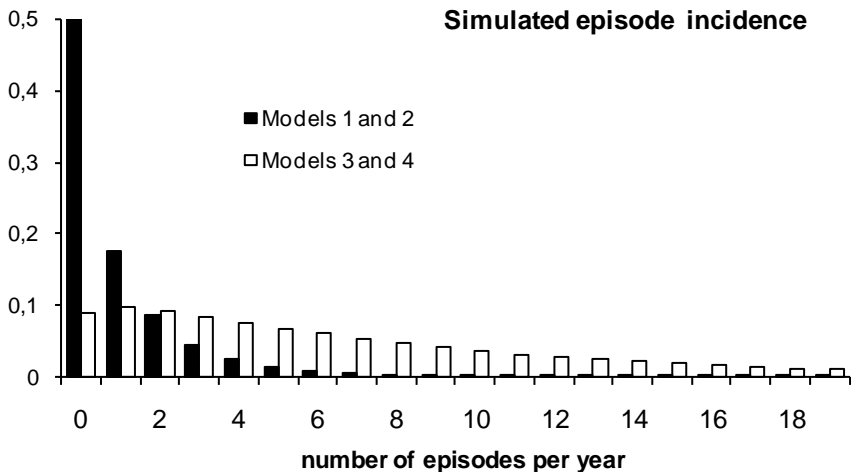

## Simulated episode duration

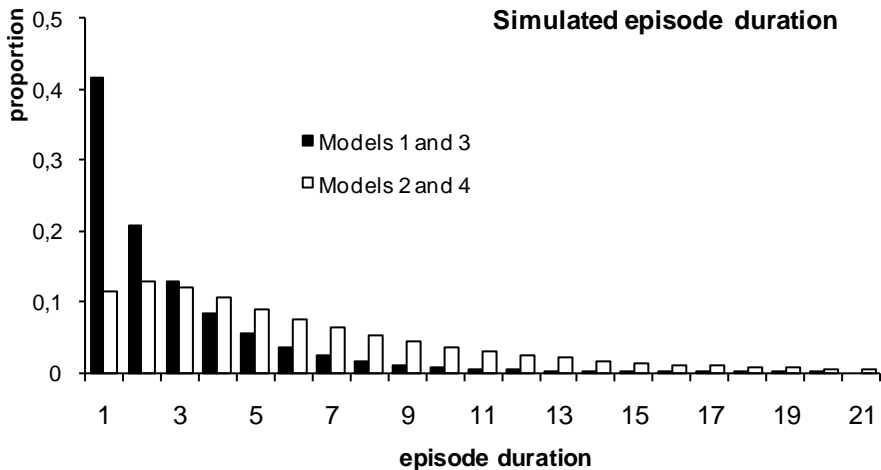

Supplement: MOESM3 [file 9604460]
